# Supplementary material for: Eco-friendly and efficient modification of native hemicelluloses via click reactions
Source: Royal Society of Chemistry journal article supplement (doi:10.1039/d2nj04076j), 2022-12-16

## Supplementary Information

### **Eco-friendly and efficient modification of native hemicelluloses *via click* reaction.**

C. A. Rodríguez-Ramírez<sup>1,2</sup>, Mirta L, Fascio<sup>1,2\*</sup>, Rosalía Agustí<sup>1,2</sup>, Norma D'Accorso<sup>1,2</sup>,  
Nancy Lis Garcia<sup>2\*</sup>.

<sup>1</sup>Universidad de Buenos Aires, Facultad de Ciencias Exactas y Naturales, Departamento de Química Orgánica, Buenos Aires Argentina.

<sup>2</sup>CONICET-Universidad de Buenos Aires. Centro de Investigación en Hidratos de Carbono (CIHIDECAR). Buenos Aires, Argentina.

\*[nancylis@qo.fcen.uba.ar](mailto:nancylis@qo.fcen.uba.ar)

\*[mfascio@qo.fcen.uba.ar](mailto:mfascio@qo.fcen.uba.ar)

**Figure S1.** NMR spectrum of **(2)** HC-N<sub>3</sub>

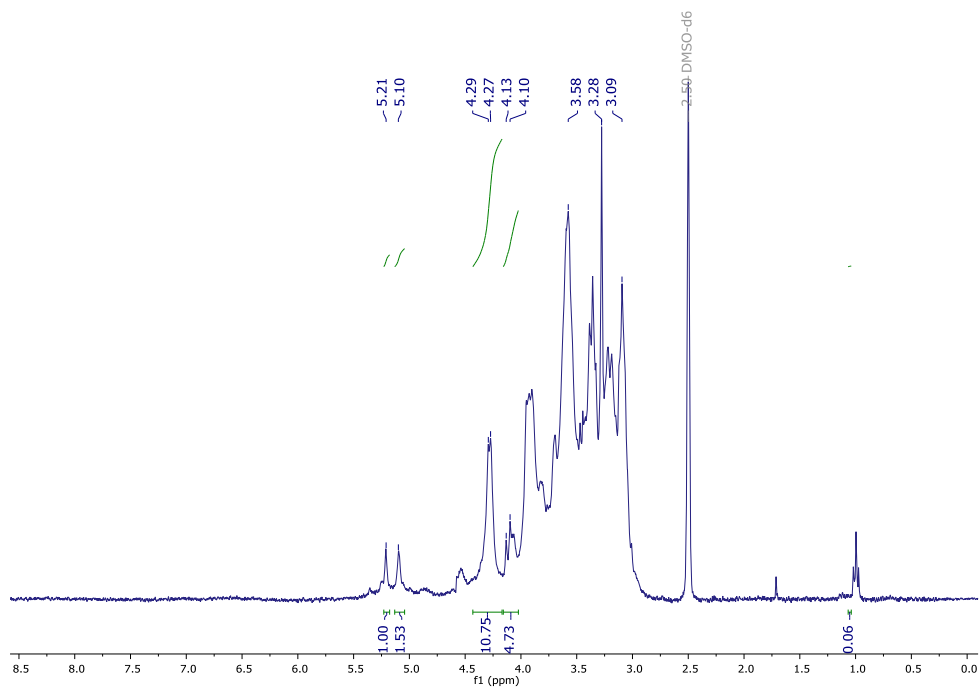

**Scheme S1.** Reaction click scheme between the azido groups of azidized-hemicellulose and phenylacetylene.

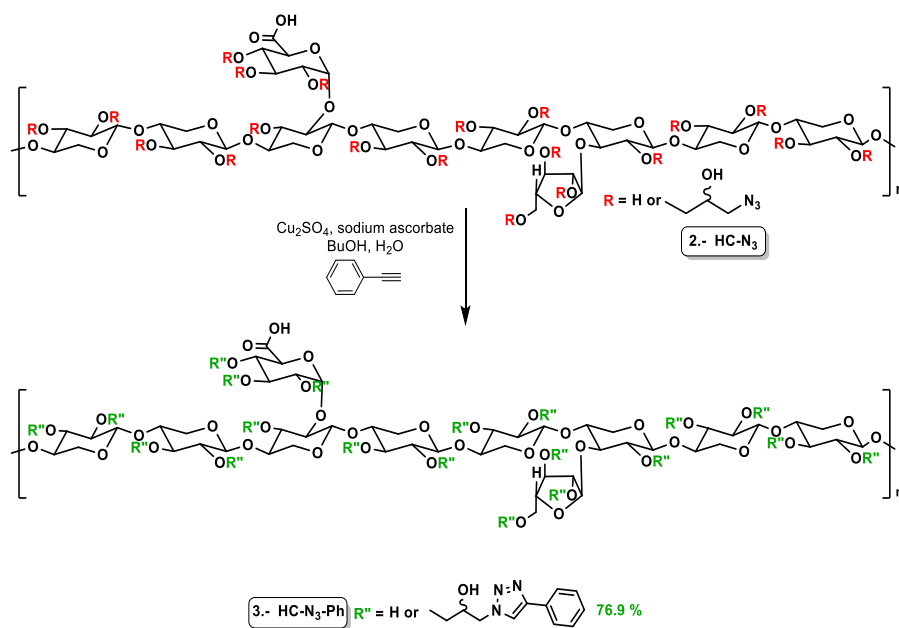

**Figure S2.** NMR spectrum of **(3)** HC-N<sub>3</sub>-Ph

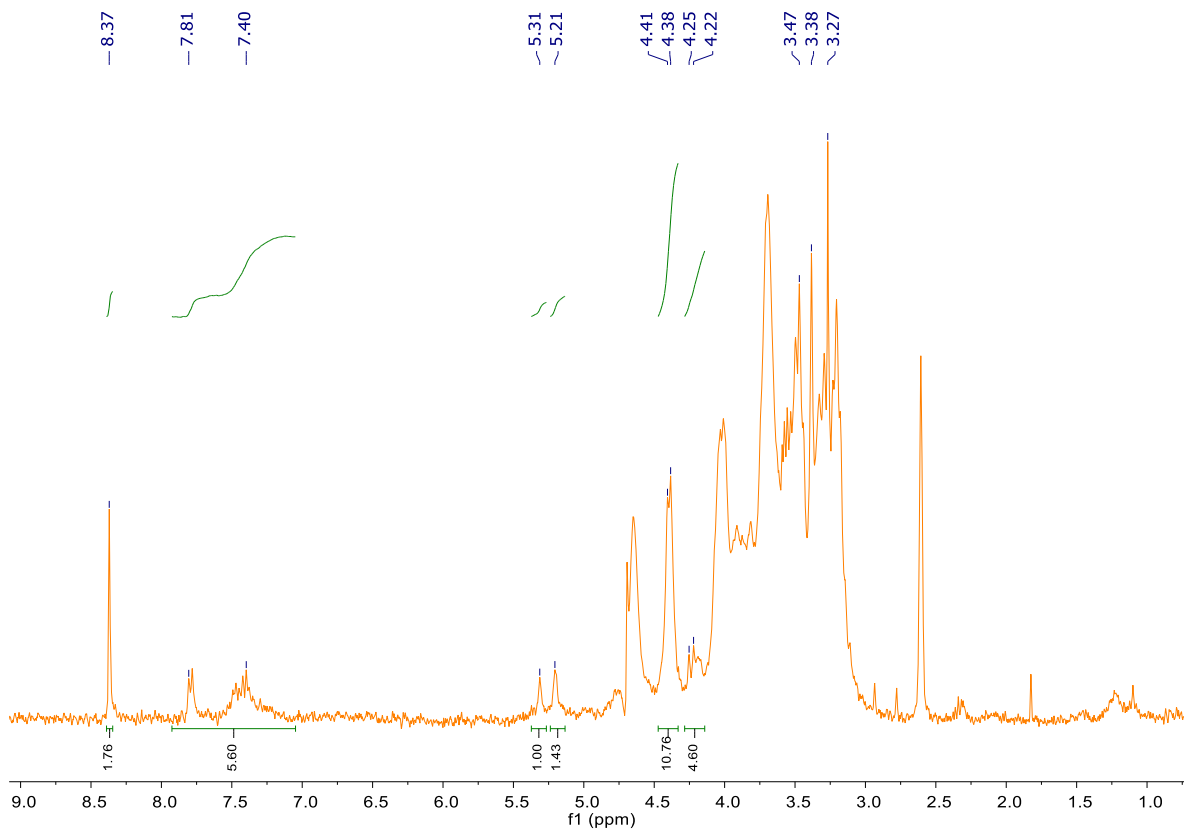

**Scheme S2.** Reaction click scheme between the azido groups of azidized-hemicellulose and 1-heptene.

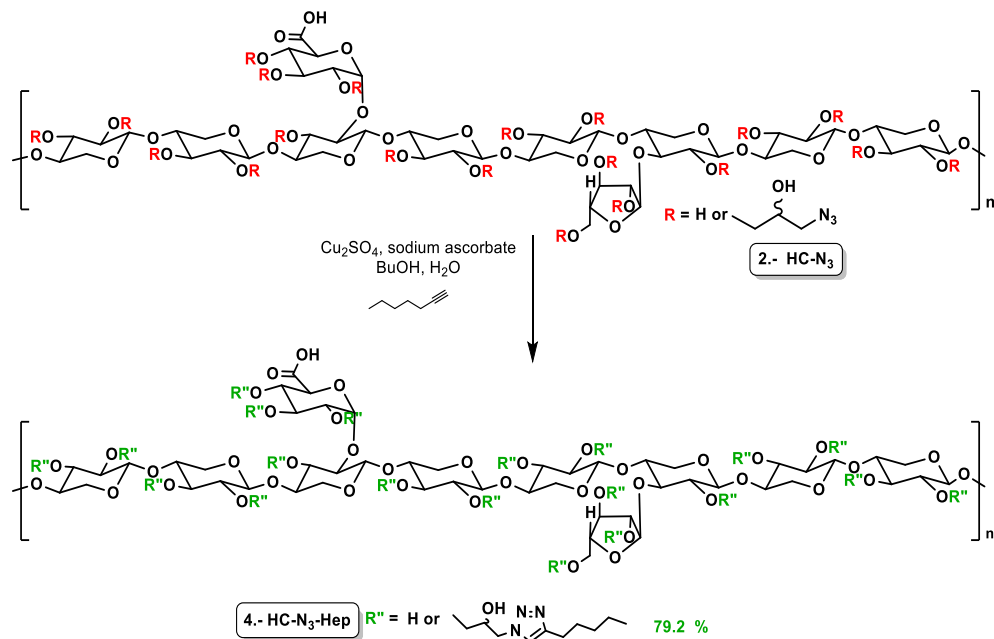

**Figure S3.** NMR spectrum of **(4)** HC-N<sub>3</sub>-Hep

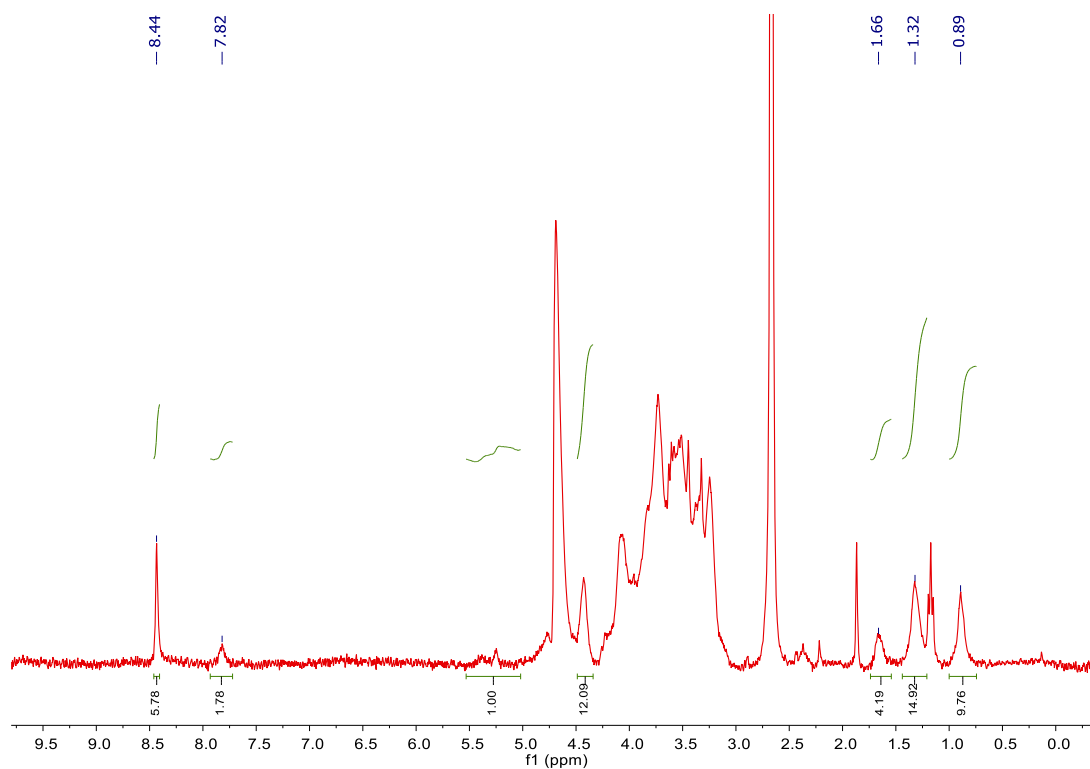

**Scheme S3.** Reaction click scheme between the azido groups of azidized-hemicellulose and flumioxazin.

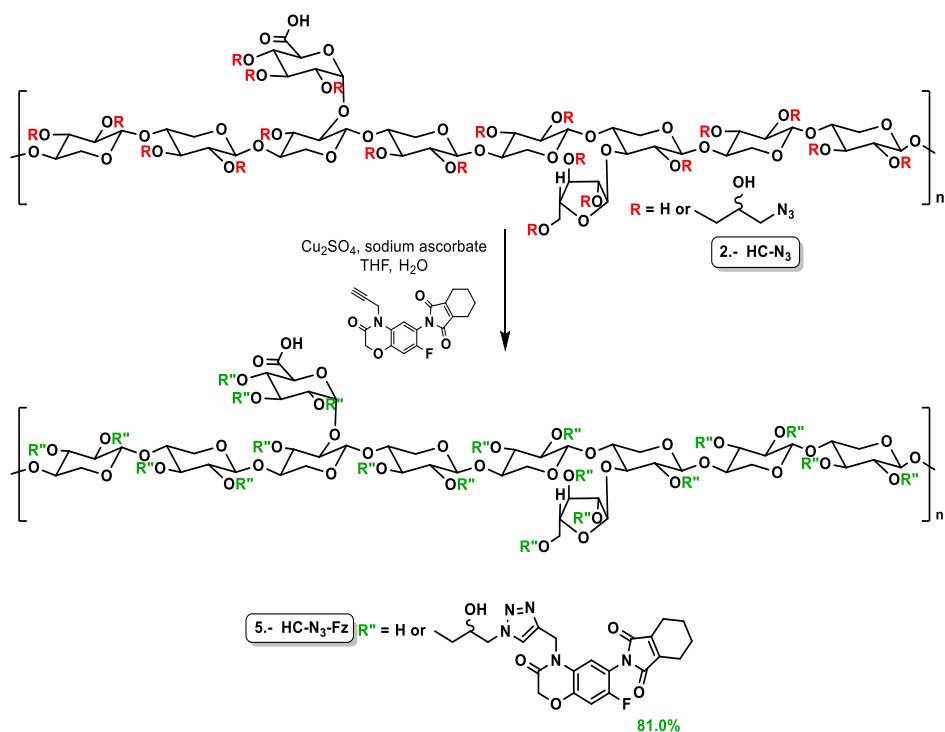

**Figure S4.** NMR spectrum of **(5)** HC-N<sub>3</sub>-Fz

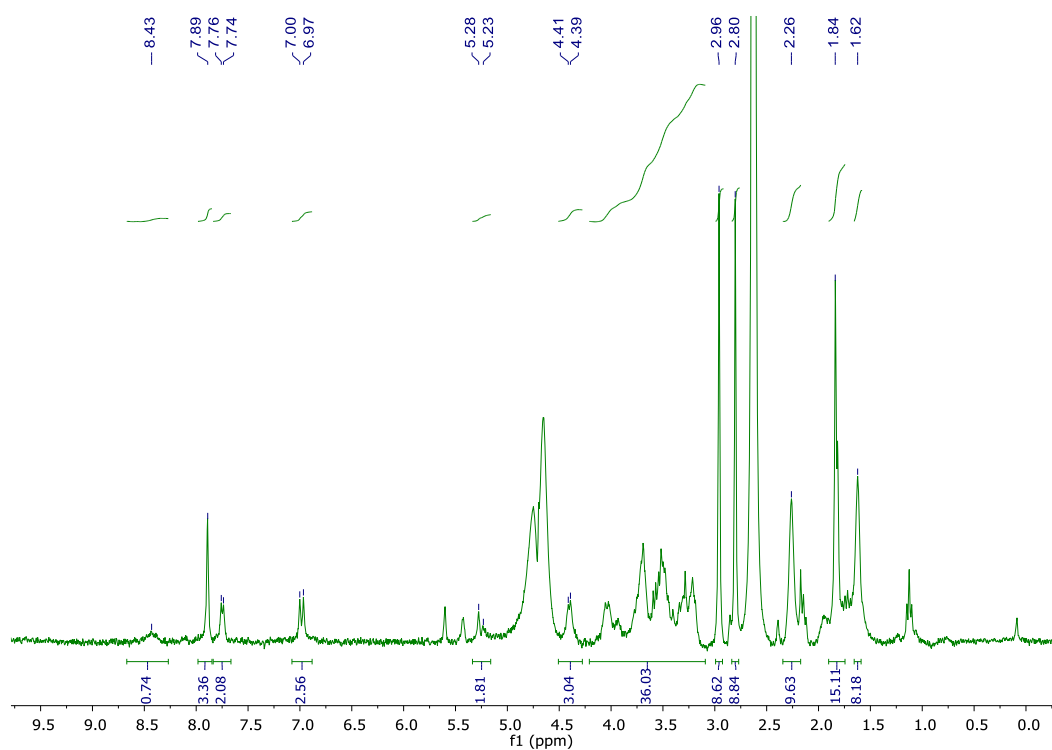

**Scheme S4.** Reaction click scheme between the azido groups of azidized-hemicellulose and bis-O-propargyl-tri(ethylene glycol).

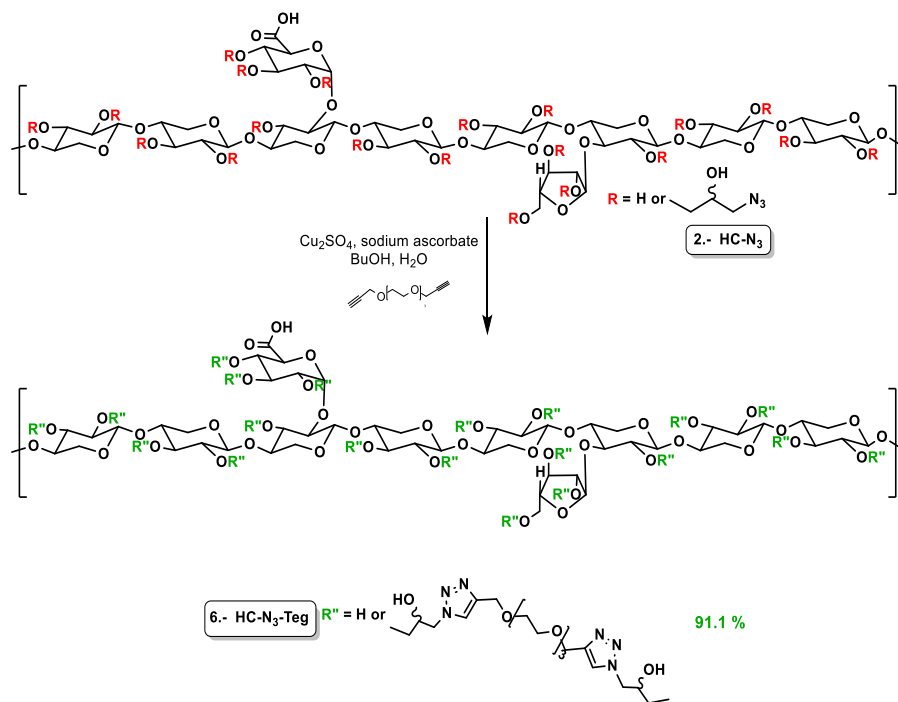

Figure S5. NMR spectrum of **(6)** HC-N<sub>3</sub>-Teg

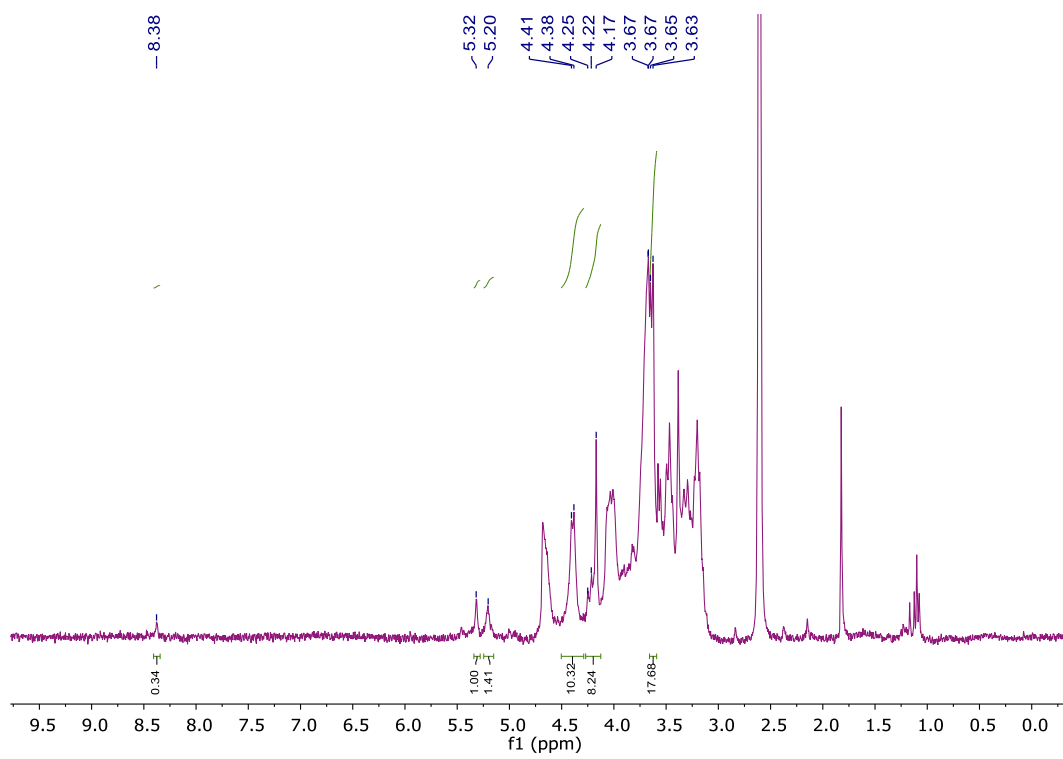

**Figure S6.** DTG thermogram of hemicellulose and modified hemicelluloses.

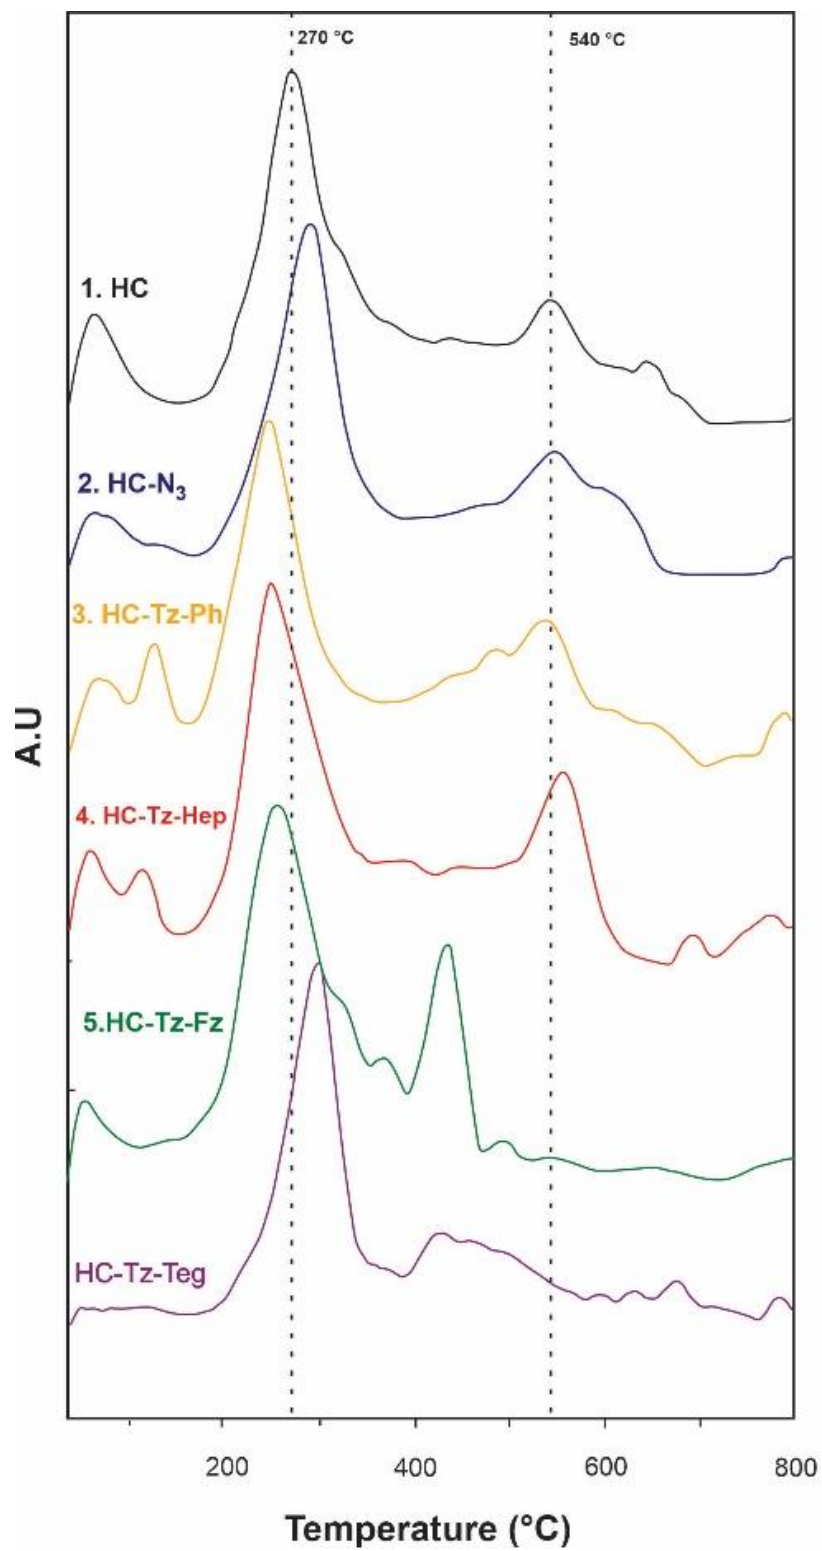

**Figure S7.** Calibration curve using different percentage of sodium azide in hemicellulose using FTIR.

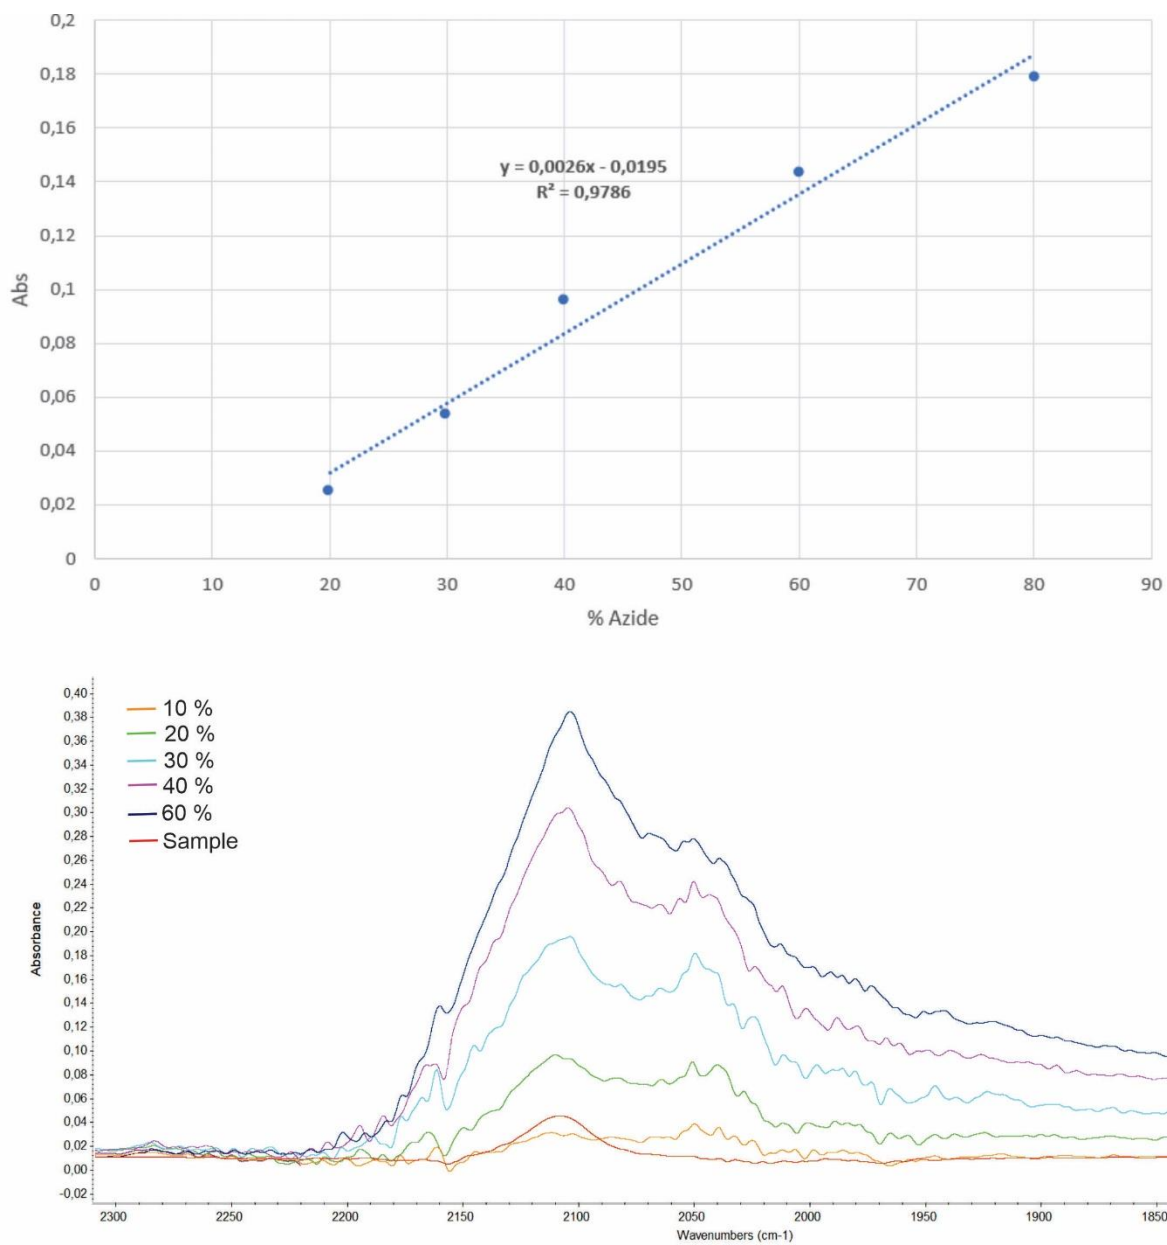

Supplement: d2nj04076j1.pdf [file d2nj04076j1.pdf]
